# Supplementary material for: In-house validation of a liquid chromatography tandem mass spectrometry method for the analysis of lipophilic marine toxins in shellfish using matrix-matched calibration
Source: PubMed Central journal article supplement — Anal Bioanal Chem. 2010 Jun 16;397(7):3079–88. doi: 10.1007/s00216-010-3886-2 (PMC2906727; doi:10.1007/s00216-010-3886-2), 2010-06-16

**Analytical and Bioanalytical Chemistry**

**Electronic Supplementary Material**

**In-house validation of a liquid chromatography tandem mass spectrometry method for the analysis of lipophilic marine toxins in shellfish using matrix matched calibration**

Arjen Gerssen, Erik H.W. van Olst, Patrick P.J. Mulder and Jacob de Boer

**Figure S1:** HorRat values obtained for the analysis of the various lipophilic marine toxins in crude shellfish extract and in SPE-purified shellfish extracts spiked at 0.5, 1 and 1.5 times the permitted level.

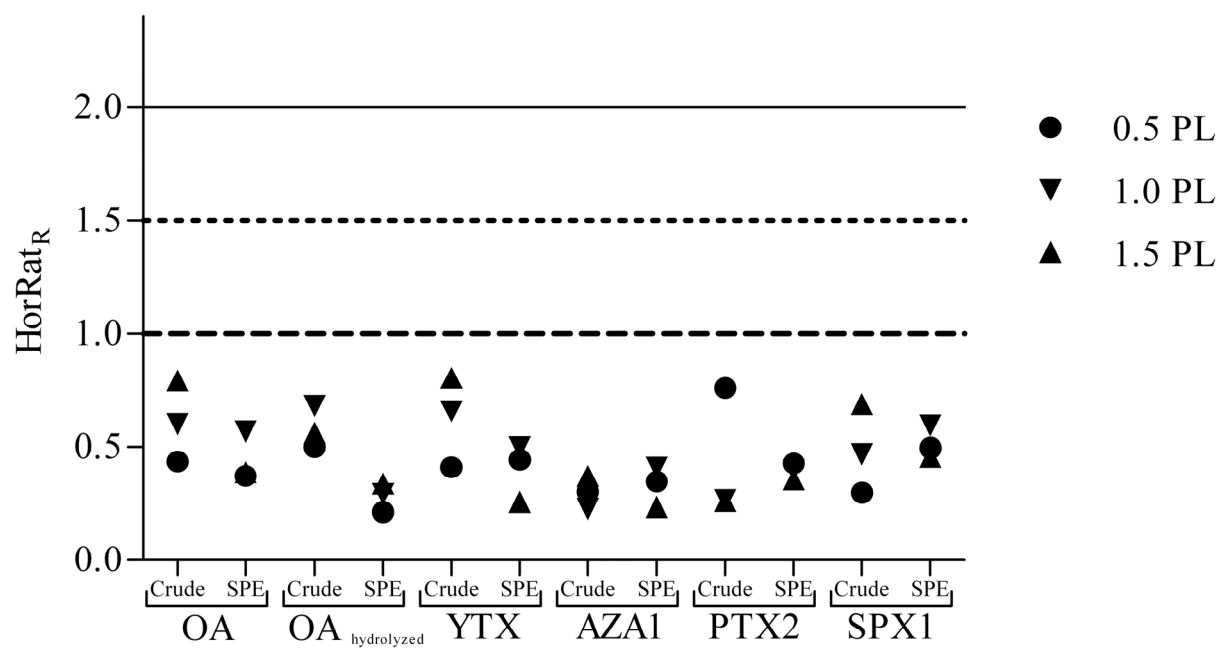

Supplement: 216_2010_3886_MOESM1_ESM.pdf [file 216_2010_3886_MOESM1_ESM.pdf]
